# Painting cell-cell interactions by horseradish peroxidase and endogenously generated hydrogen peroxide

Inyoung Jeong<sup>1,4</sup>, Kwang-eun Kim<sup>1,2\*</sup>, and Hyun-Woo Rhee<sup>1,3\*</sup>

<sup>1</sup>Department of Chemistry, Seoul National University, Seoul 08826, Korea

<sup>2</sup>Department of Convergence Medicine, Yonsei University Wonju College of Medicine, Wonju 26426, Korea

<sup>3</sup>School of Biological Sciences, Seoul National University, Seoul 08826, Korea

<sup>4</sup>Current address: College of Chemistry, University of California, Berkeley, CA, USA

---

**ABSTRACT:** Cell-Cell interactions are fundamental in biology for maintaining physiological conditions, with direct contact being the most straightforward mode of interaction. Recent advancements have led to the development of various chemical tools for detecting or identifying these interactions. However, the use of exogenous cues, such as toxic reagents, bulky probes, and light irradiations, can disrupt normal cell physiology. For example, the toxicity of hydrogen peroxide (H<sub>2</sub>O<sub>2</sub>) limits the applications of peroxidases in proximity labeling field. In this study, we aimed to address this limitation by demonstrating that membrane-localized Horseradish Peroxidase (HRP-TM) efficiently utilizes endogenously generated extracellular H<sub>2</sub>O<sub>2</sub>. By harnessing endogenous H<sub>2</sub>O<sub>2</sub>, we observed that HRP-TM-expressing cells can effectively label contacting cells without the need for exogenous H<sub>2</sub>O<sub>2</sub> treatment. Furthermore, we confirmed that HRP-TM labels proximal cells in an interaction-dependent manner. These findings offer a novel approach for studying cell-cell interactions under more physiological conditions, without the confounding effects of exogenous stimuli. Our study contributes to elucidating cell-cell interaction networks in various model organisms, providing valuable insights into the dynamic interplay between cells in their native network.

---

1 Cell-Cell interactions are crucial for regulating cellular physiology, playing essential roles in neuronal signaling, tissue  
2 formation, immune responses, and tumor progression <sup>[1-4]</sup>. T cells, for instance, are activated when they recognize antigen-  
3 presenting cells by direct contact, while tumor microenvironments consist of interactions among various cell types,  
4 including cancer cells and non-cancerous cells such as immune cells, endothelial cells, or fibroblasts <sup>[5]</sup>. It is essential to  
5 identify intercellular networks at the tissue level while maintaining physiological conditions.

6 Recently, several studies on cell-cell interaction have been reported with diverse approaches. One of the most widely used  
7 is a fluorescence-based method. Porterfield et al. developed a tool to detect cell-cell contact via luciferase-luciferin reaction

8 <sup>[6]</sup>. In addition, Tang et al. suggested a new tool, G-baToN, in which GFP and anti-GFP nanobody ( $\alpha$ GFP) record the  
9 intercellular interactions <sup>[7]</sup>. Another method based on a cell-penetrating fluorescent protein was suggested by Ombrato et  
10 al., as a system for identifying the spatial cellular environment of metastatic cancers <sup>[8]</sup>. However, the above methods require  
11 engineered ligand and receptor expression, which makes it impossible to reveal cell-cell interactions between unknown cell  
12 types, and the interaction between artificial ligand-receptor pair could influence physiological cell-cell contact events.

13 Proximity labeling has become a versatile tool for studying spatiotemporal proteomics and has emerged as a powerful  
14 tool for deciphering cell-cell interaction <sup>[1]</sup>. LIPSTIC, which utilizes sortaseA (SrtA) to transfer LPXTG-biotin to N-terminal  
15 oligoglycine of proteins at the cell surface, confirmed the interactions of dendritic cells and T-cells <sup>[9]</sup>. Recently, it has been  
16 developed into EXCELL <sup>[10]</sup>, an engineered SrtA (mgSrtA) to functionalize the enzyme for transferring LPXTG-biotin to  
17 N-terminal monoglycine. However, the relatively bulky conjugate (LPETG=520 Da) compared to biotin (244 Da) makes  
18 the tissue penetration of LPETG-biotin uncertain. PUP-IT <sup>[11]</sup> and FucoID <sup>[12, 13]</sup> have also been reported as methods that  
19 allow exogenous enzymes to be expressed in bait cells, enabling protein/peptide or glycosylation probes to be displayed on  
20 prey cells. In this case, direct cell-cell interactions can be selectively detected by enzymatic reaction, however, efficient  
21 delivery of large molecular weight probes (e.g. LPETG peptide, PUP protein, fucosylation donor) for these proximity  
22 labeling methods should be optimized for *in vivo* application.

23 Recently, photocatalysts have been developed to capture spatial biological network or spatiome <sup>[14]</sup>. MicroMap ( $\mu$ Map),  
24 a photocatalytic reaction of Iridium that generates reactive carbene species upon blue light irradiation, has been suggested  
25 as a tool with a significantly short labeling radius of around 4 nm <sup>[15]</sup>. Oslund et al. have designed riboflavin tetracetate  
26 (RFT) mediated labeling of proteins, called photocatalytic cell-tagging (PhoTag) <sup>[16]</sup>. Lie et al. reported antigen-specific T  
27 cell detection using the photosensitizer dibromofluorescein (DBF) termed PhoXCELL <sup>[17]</sup>, and Qiu et al. developed Ru-<sup>1</sup>O<sub>2</sub>-  
28 hydrazide system for photocatalytic cell labeling <sup>[18]</sup>. However, light irradiation for photocatalytic reactions critically limits  
29 their use to *in vitro* or cell-level applications rather than *in vivo*.

30 Owing to the aforementioned potential limitations of proximity labeling tools for *in vivo* application for labeling cell-cell  
31 interaction, we hypothesized that peroxidases could effectively address these challenges. Peroxidases such as APEX2 and  
32 Horseradish Peroxidase (HRP) catalyze the oxidation of phenol substrates like desthiobiotin-phenol (DBP= 333.43 Da) <sup>[19]</sup>  
33 to generate phenoxy radicals in the presence of hydrogen peroxide (H<sub>2</sub>O<sub>2</sub>). This reaction enables protein labeling by forming  
34 covalent bonds between biotin-phenoxy radicals and electron-rich amino acid residues, such as tyrosine. Previous studies  
35 have utilized exogenous HRP, split HRP, or nucleic acid-based HRP mimics, such as G-quadruplex/hemin, to label and  
36 identify surface proteomes and intercellular protein-protein interactions in various *in vitro* or *ex vivo* models <sup>[20, 21, 22, 23]</sup>.  
37 However, the toxicity of exogenous H<sub>2</sub>O<sub>2</sub> treatment limits its application.

38 Recent research has demonstrated that live cells generate endogenous H<sub>2</sub>O<sub>2</sub> under physiological conditions <sup>[24, 25, 26]</sup>. In the  
39 extracellular space, endogenous reactive oxygen species (ROS) is generated by NADPH oxidase (NOX) <sup>[27]</sup> or H<sub>2</sub>O<sub>2</sub> can  
40 also diffuse directly across the membrane via aquaporin <sup>[28]</sup>. Consequently, extracellular H<sub>2</sub>O<sub>2</sub> is continuously produced  
41 through this process. Study by the Hamachi group has reported that endogenously generated H<sub>2</sub>O<sub>2</sub> can activate chemical  
42 probe for proximal protein labeling <sup>[24]</sup> and our group also reported that subcellularly expressed APEX2 can be activated by  
43 endogenously generated ROS in live cells <sup>[25]</sup>. Ju and colleagues successfully labeled protein on the cell surface using HRP,

utilizing endogenously generated  $H_2O_2$  during cell starvation [26]. Thus, we hypothesized that the APEX2/HRP reaction could utilize  $H_2O_2$  on the cell contact under the physiological condition.

To develop a proximity labeling tool for mapping intercellular interactions, we designed an APEX2/HRP construct with Ig $\kappa$  leader signal peptide (SP) in the N-terminus and the transmembrane domain (TM) of PDGF receptor beta, which exposes the peroxidase extracellularly. We anticipated that the peroxidase reaction with DBP, with or without  $H_2O_2$  treatment, would biotinylate surface proteins of HRP-TM expressing cells and their proximal cells (**Figure 1**).

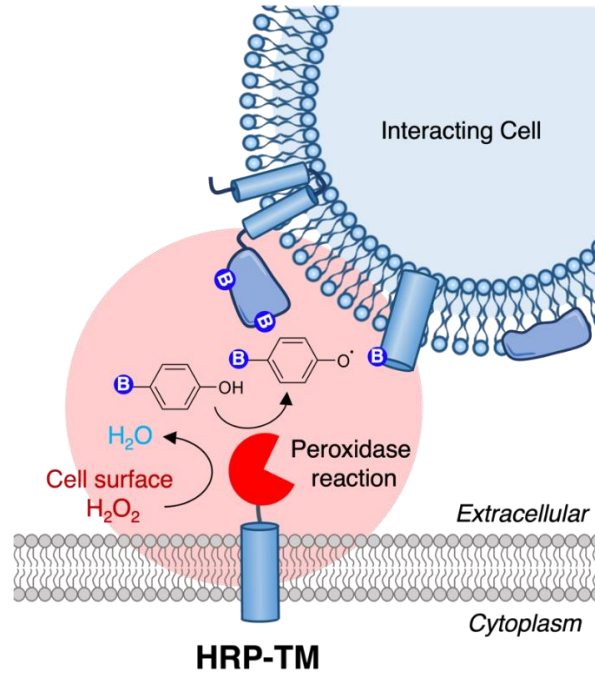

**Figure 1. Scheme of endogenous hydrogen peroxide-assisted proximal cell labeling.** HRP is expressed in the extracellular space by fusing transmembrane domain (TM). Upon biotin-phenol addition, HRP biotinylates membrane proteins of proximal cells by utilizing endogenous  $H_2O_2$  generated in the extracellular space.

## Results

First, we compared the utilization of endogenous  $H_2O_2$  between APEX2 and HRP. HRP-TM or APEX2-TM were transiently expressed in HEK293T cells to compare the labeling efficiency with or without exogenous  $H_2O_2$  treatment. HRP-TM is fused with a Myc tag, and APEX2-TM is fused with a V5 tag, respectively. Anti-Myc and Anti-V5 blots confirmed the expression of each construct (**Figure 2A**). Non-specific bands in the V5 blot indicated equal protein loading. Biotinylated proteins were detected in the Streptavidin(SA)-HRP blot. With additional  $H_2O_2$  treatment, both HRP and APEX2 effectively biotinylated proteins (**Figure 2A**). Immunofluorescence imaging confirmed the labeling of the cell surface under  $H_2O_2$  treatment condition (**Figure S1**).

Interestingly, without  $H_2O_2$  treatment, HRP still showed cell surface biotinylation, unlike APEX2 (**Figure 2A, B**). In the imaging experiments, Anti-Myc and Anti-V5 confirmed the cell surface localization of HRP-TM and APEX-TM. Without exogenous  $H_2O_2$ , cell surface biotinylation was only detected in HRP-TM expressing cells. We observed that HRP exhibited higher labeling efficiency than APEX2. This can be explained by HRP having a 4-fold higher  $k_{cat}/K_M$  value than APEX2

<sup>[29]</sup>, and HRP, but not APEX2, has glycosylation <sup>[30]</sup> contributing to effective labeling on the plasma membrane. Our findings suggest the possibility of HRP-TM could label proximal cells utilizing endogenously generated H<sub>2</sub>O<sub>2</sub>.

In this experiment, we also prepared TurboID-TM expressed cells for a comparative experiment. It is noteworthy that TurboID, an engineered biotin ligase has been applied to study astrocyte-neuron interactions at tripartite peri-synapses in the mouse brain. However, TurboID catalyze the labeling reaction from biotin and ATP and it has been pointed out that the extracellular ATP concentration is 1000-fold lower than the estimated K<sub>M</sub> value of TurboID <sup>[31]</sup> and it is expected that labeling intensity of TurboID at the cell surface can be highly dependent of extracellular concentration of ATP which requires experimental validation. As expected, it was shown that cell surface TurboID had significantly lower labeling efficiency than HRP and APEX2, despite the addition of ATP (**Figure S2**) possibly due to the active hydrolase activity for ATP at the cell surface <sup>[32]</sup>. Since excess treatment of ATP can cause innate immune response by purinergic receptor <sup>[33]</sup>, we excluded the utilization TurboID in our cell-cell labeling study and we focused utilization of HRP for cell-cell interaction labeling.

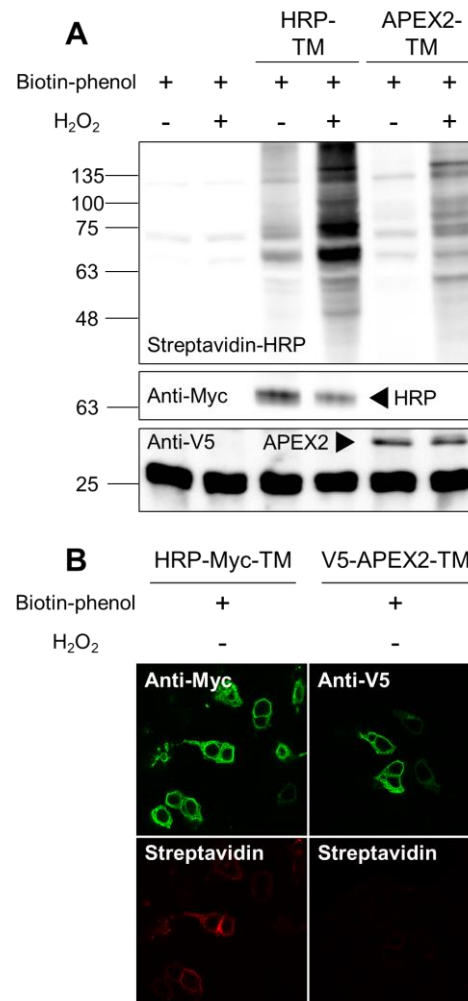

**Figure 2. Comparison of H<sub>2</sub>O<sub>2</sub> facilitating activity of peroxidase at the cell surface.** (A) Western blots of biotinylated proteins (SA-HRP) labeled by HRP-TM or APEX2-TM with or without exogenous H<sub>2</sub>O<sub>2</sub> treatment. (B) Immunofluorescence imaging HRP-TM (Anti-Myc) or APEX2-TM (Anti-V5) and biotinylated proteins (Streptavidin-Alexa).

83 To confirm that HRP-TM can label the cell-cell contact site, we generated 293 Flip-In T-REx cell lines that stably express  
84 HRP-TM on the cell surface. Wild-type (WT) cells were stained with the green CMFDA dye in advance and co-cultured  
85 with HRP-TM expressing cells for 24 hours. Then, the cells were incubated and stained for confocal fluorescence  
86 microscopy imaging (**Figure 3A**). When excessive  $H_2O_2$  was treated to cells, diffusive labeling was observed (**Figure 3B**)  
87 On the other hand, cells labeled only with endogenous  $H_2O_2$  showed a defined radius of biotinylation, with only about half  
88 of the cell membrane being labeled. This result indicates that HRP-TM could successfully paint proximal cells with DBP  
89 in contact by utilizing endogenous  $H_2O_2$  and shows more spatially restricted biotinylation on cells (**Figure 3C**).

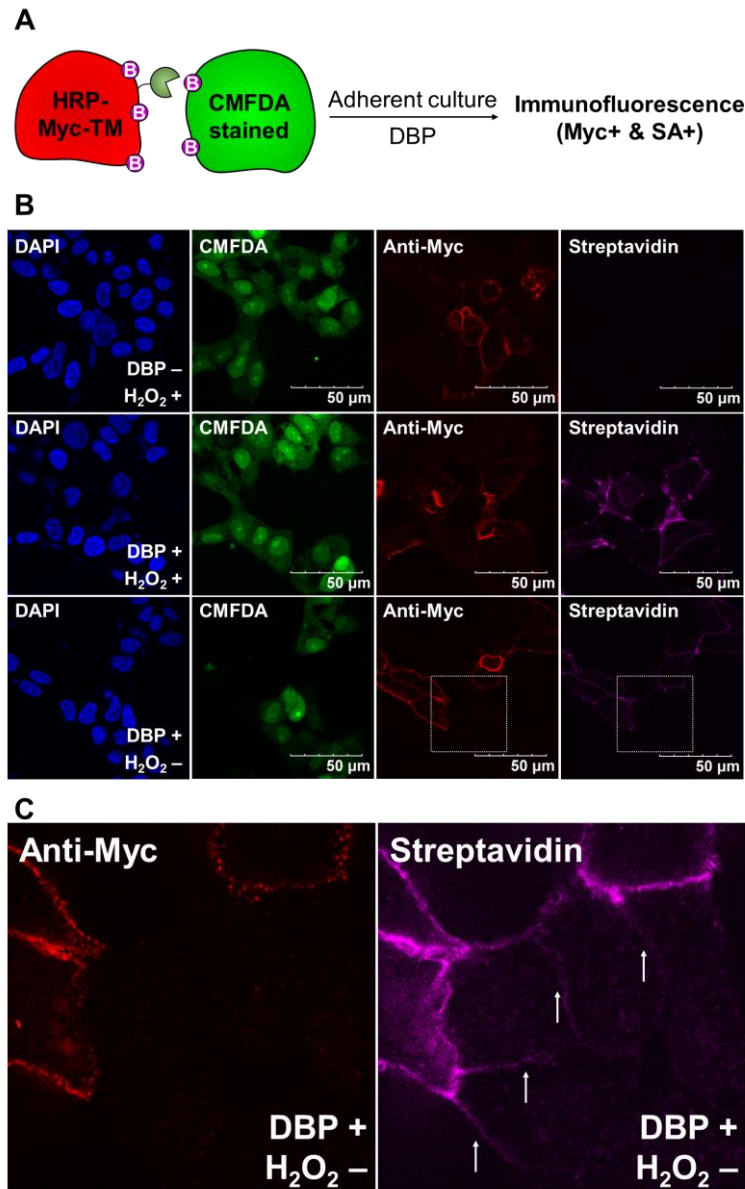

91  
92 **Figure 3. Contact-dependent biotinylation via HRP-TM.** (A) HRP-TM stable cells were co-cultured adherently with WT  
93 cells stained with green CMFDA dye, and DBP was added for HRP-mediated biotinylation. Cells were stained with DAPI,  
94 mouse anti-Myc, anti-mouse-AF568, and Streptavidin-AF647 for fluorescence microscopy. (B) Confocal fluorescence  
95 microscopy images of HRP-TM mediated biotinylation of contacting cells. (C) Zoom-in regions in (B).

Next, to test whether HRP-TM can successfully label interacting cells specifically, we employed two pairs of epitope tag-nanobody to induce intercellular interactions: HAFrankenbody (HAFB, 26.6 kDa)-3xHA tag (YPYDVPDYA)<sup>[34]</sup> and ALFAnanobody (NbALFA, 14.5 kDa) -ALFA tag (SRLEELRRRLTE)<sup>[35]</sup>. HAFB and NbALFA are known to bind their target tags strongly with high binding affinity of  $K_D = 14.7 \pm 7.4$  nM and  $K_D = \sim 26$  pM respectively<sup>[34, 35]</sup>. HAFB (Cell A) and HA-tag (Cell a), or NbALFA (Cell B) and ALFA-tag (Cell b) will result in two cells in proximity, thereby biotinylation across cell-cell interface (**Figure 4A**).

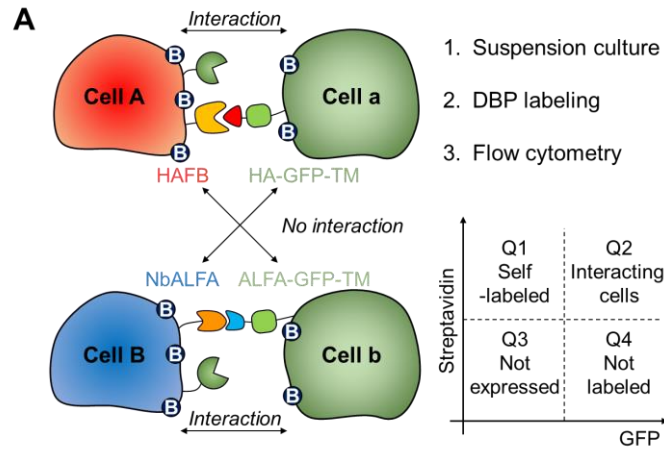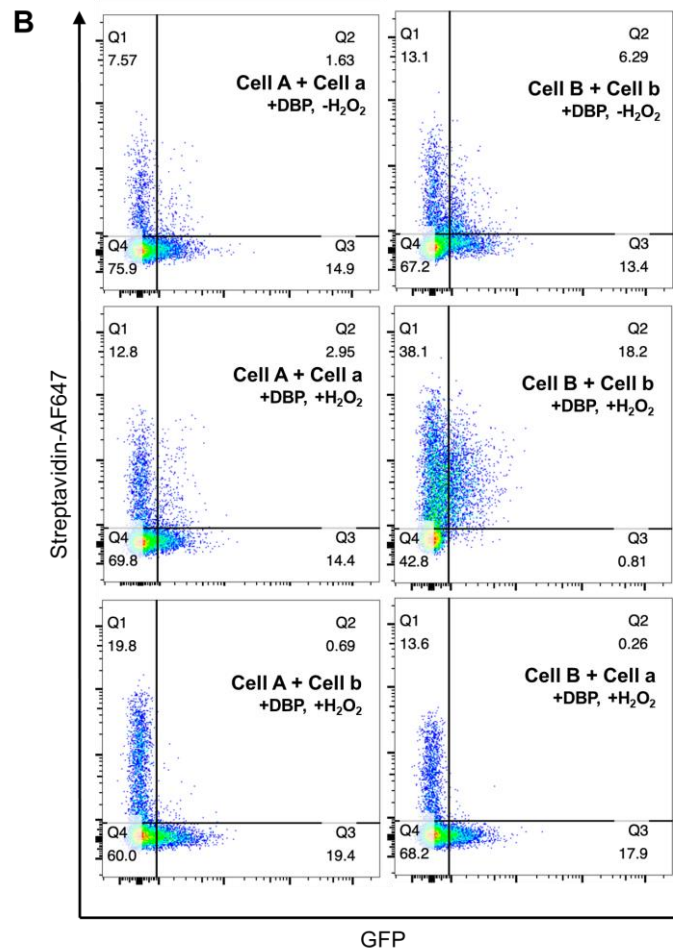

**Figure 4. Cell-cell interaction-dependent biotinylation via HRP-TM.** (A) Experimental scheme of interaction-dependent biotinylation mediated by HRP-TM. Cell A and Cell a were mixed either with Cell B or Cell b, followed by the sequential addition of DBP. Cells were then stained with streptavidin-AF647 and analyzed by flow cytometry. (B) Flow cytometric analysis of HAFB ( $\alpha$ HA)-HA tag and NbALFA ( $\alpha$ ALFA)-ALFA tag interaction-dependent biotinylation via HRP-TM, even in the absence of exogenous  $H_2O_2$ .

To assess cell-cell interaction-dependent biotinylation, four groups of cells were prepared. Cell A and Cell B were both transfected with HRP-TM, along with HAFB-TM or NbALFA-TM, respectively. Cell a and Cell b were transfected with 3xHA-GFP-TM or ALFA-GFP-TM, respectively. Cell A and Cell B were then either mixed with Cell a or Cell b, followed by DBP for biotinylation, with or without exogenous  $H_2O_2$ . The cells were subsequently stained and analyzed by flow cytometry. In this experiment, we also tested the combination of Cell A and Cell b, or Cell B and Cell a, which were expected to have no interaction. In flow cytometry graph, Q1 (Streptavidin positive and GFP negative) represents self-labeled cells by HRP-TM, Q2 (Streptavidin positive and GFP positive) represents interacting proximal cells, Q3 (Streptavidin negative and GFP negative) represents cells that were not expressed, and Q4 (Streptavidin negative and GFP positive) represents HAFB or NbALFA expressed cells but not biotin labeled (**Figure 4A**). In addition, the labeling efficiency was calculated by dividing the fraction of both GFP and streptavidin positive cells by that of total GFP positive cells (**Figure S3**).

Under  $H_2O_2$  treatment condition (**Middle, Figure 4B**), both Cell A and Cell B successfully labeled their interacting proximal cells (Q2). Because NbALFA has a lower  $K_D$  than HAFB, the labeling of proximal cells in the NbALFA-ALFA pair (Cell B - Cell b, 95.7%) was more efficient than in the HAFB-HA pair (Cell A - Cell a, 17.0%). In mismatched pairs (Cell A - Cell b, Cell B - Cell a), almost no biotinylation (3.4%, 1.4%) was observed even under  $H_2O_2$  treatment (**Bottom, Figure 4B**), indicating the interaction specificity between two ligand-receptor pairs. Interestingly, matched cells (Cell A - Cell a, Cell B - Cell b) were biotinylated (9.8%, 31.9%) even without exogenous  $H_2O_2$  (**Top, Figure 4B**). Consistent with other data, HRP-TM labeled the proximal cells in an interaction-specific manner by utilizing endogenously generated  $H_2O_2$ .

## Discussion

In this study, we showed that HRP, not APEX2, can facilitate endogenously generated  $H_2O_2$  on the cell surface and label proximal cells. Our findings imply that HRP-mediated biotinylation can be used for *in vivo* applications on the cell surface to detect cell-cell networks without toxic  $H_2O_2$  treatment. Several studies have used HRP for cell-surface proteome profiling. Li et al. [36] developed an HRP-based technique for cell-surface proteome profiling in the brain tissue of *Drosophila*. Shuster et al. [31] applied HRP-mediated cell-surface proteomics to the mouse brain. Since HRP showed no toxicity issue in their expression in live animal model in these studies [28, 33], we expect that our cell-cell interaction labeling technique can be employed in these HRP-expressed animal models. We believe that HRP-mediated proximal cell labeling has advantages in overcoming the limitations of other approaches, such as utilization of high molecular weight of probe (LIPSTIC, EXCELL, PUP-IT, FucoID) [9, 10, 11, 12], light irradiation ( $\mu$ Map, PhoTag, PhoXCELL, Ru- $^1O_2$ -hydrazide) [15, 16, 17, 18], low concentration of extracellular ATP (TurboID) [37], and exogenous treatment of  $H_2O_2$  (APEX2).

139 While utilizing endogenously generated H<sub>2</sub>O<sub>2</sub> for initiating HRP-mediated labeling offers advantages, there are some  
140 caveats associated with this approach. Firstly, the production of H<sub>2</sub>O<sub>2</sub> can vary across different cell types. Secondly, even  
141 within the same cell type, the levels of H<sub>2</sub>O<sub>2</sub> production may fluctuate under different cellular states. These factors can  
142 influence the effectiveness of capturing cell-cell interactions. For example, variations in the quantity of H<sub>2</sub>O<sub>2</sub> produced by  
143 cells before and after drug treatment may lead to changes in the labeling of interacting cells. Such fluctuations may not  
144 accurately represent the cell interactions themselves but rather arise from shifts in H<sub>2</sub>O<sub>2</sub> production levels.

145 Recently, an integrated approach utilizing proximity labeling and omics data has been reported. Oslund et al. <sup>[16]</sup> combined  
146 PhoTag with multiomics single-cell sequencing and discovered specific T cell subtype in human peripheral blood  
147 mononuclear cell (PBMC) that interacted more with Raji B cells. Zhang et al. <sup>[38]</sup> applied QMID to the mouse spleen and  
148 characterized gene expression profiles of CD4<sup>+</sup> or CD8<sup>+</sup> proximal cells by single-cell RNA sequencing (scRNA-Seq).  
149 However, these methods are limited to *ex vivo* models, thus prompting increased interest in developing a tool suitable for  
150 *in vivo* models. In this context, Hamachi et al. proposed a new bacterial tyrosinase-based PL method, emphasizing its  
151 efficient application *in vivo* <sup>[39]</sup>. In this paper, we propose the possibility that HRP-TM could paint proximal cells in *in vivo*  
152 models by utilizing endogenously generated H<sub>2</sub>O<sub>2</sub>. Exploring the interaction between viruses and cells is also an interesting  
153 theme, as viruses rely on receptor proteins to invade host cells <sup>[40]</sup>. By integrating the outcomes of HRP-mediated cell  
154 labeling with additional spatial omics data, such as single-cell RNA sequencing (scRNA-seq), we anticipate a  
155 comprehensive elucidation of the intricate cell-cell network implicated in disease progression. This approach promises to  
156 provide valuable insights into the dynamic cellular landscape underlying various pathological conditions.

## 157 ASSOCIATED CONTENT

159 **Supporting Information.** The Supporting Information is available free of charge at <http://pubs.acs.org>.

160 Supporting Information: Materials and methods, construct information, and additional experimental figures including  
161 immunofluorescence microscopy images and Western blot (PDF).

## 162 AUTHOR INFORMATION

### 163 Corresponding Author

164 **Kwang-eun Kim** – Department of Chemistry, Seoul National University, Seoul 08826, Korea; Department of  
165 Convergence Medicine, Yonsei University Wonju College of Medicine, Wonju 26426, Korea; [orcid.org/0000-0002-5355-](https://orcid.org/0000-0002-5355-1979)  
166 1979; Email: [kekim@yonsei.ac.kr](mailto:kekim@yonsei.ac.kr)

167 **Hyun-Woo Rhee** – Department of Chemistry, Seoul National University, Seoul 08826, Korea; [orcid.org/0000-0002-](https://orcid.org/0000-0002-3817-3455)  
168 3817-3455; Email: [rheehw@snu.ac.kr](mailto:rheehw@snu.ac.kr)

### 170 Author Contributions

171 I.J. performed experiments. K.K. and H.W.R. supervised the research. I.J., K.K., and H.W.R. wrote the manuscript.



172

173 **Notes**

174 The authors declare no competing financial interest.

175 **ACKNOWLEDGMENT**

176 This work was supported by the National Research Foundation of Korea (NRF-2022R1A2B5B03001658, NRF-  
177 2022M3H9A2096199, NRF-2022M3E5E8081185, RS-2023-00265581 and RS-2023-00260454 to H.W.R, NRF-  
178 2022R1C1C2004982 to K.e.K.) and Korea Health Industry Development Institute (KHIDI) funded by the Ministry of Health  
179 & Welfare and Ministry of Science and ICT, Republic of Korea (grant numbers: HU23C0204). H.-W.R. was supported by  
180 the Samsung Science and Technology Foundation (SSTF-BA2201-08).

181 **ABBREVIATIONS**

182 HRP, Horseradish peroxidase; TM, Transmembrane domain; DBP, Desthiobiotin-phenol; CMFDA, 5-  
183 Chloromethylfluorescein diacetate; GFP, Green fluorescent protein.

184 **REFERENCES**

- 185 (1) Bechtel, Tyler J., et al. "Strategies for monitoring cell-cell interactions." *Nature chemical biology* **2021**, 17, 641-652.
- 186 (2) Armingol, Erick, et al. "Deciphering cell-cell interactions and communication from gene expression." *Nature Reviews*  
187 *Genetics* **2021**, 22, 71-88.
- 188 (3) Wright, Megan H. "Chemical biology tools for protein labelling: insights into cell-cell communication." *Biochemical*  
189 *Journal* **2023**, 480 1445-1457.
- 190 (4) Armingol, Erick, Hratch M. Baghdassarian, and Nathan E. Lewis. "The diversification of methods for studying cell-  
191 cell interactions and communication." *Nature Reviews Genetics* **2024**, 1-20.
- 192 (5) Nishida-Aoki, Nao, et al. "Emerging approaches to study cell-cell interactions in tumor microenvironment." *Oncotarget*  
193 **2019**, 10, 785-797.
- 194 (6) Porterfield, William B., et al. "A "caged" luciferin for imaging cell-cell contacts." *J. Am. Chem. Soc.* **2015**, 137, 8656-  
195 8659.
- 196 (7) Tang, Rui, et al. "A versatile system to record cell-cell interactions." *eLife* **2020**, 9, e61080.
- 197 (8) Ombrato, Luigi, et al. "Metastatic-niche labelling reveals parenchymal cells with stem features." *Nature* **2019**, 572, 603-  
198 608.
- 199 (9) Pasqual, Giulia, et al. "Monitoring T cell-dendritic cell interactions *in vivo* by intercellular enzymatic  
200 labelling." *Nature* **2018**, 553, 496-500.
- 201 (10) Ge, Yun, et al. "Enzyme-mediated intercellular proximity labeling for detecting cell-cell interactions." *J. Am. Chem.*  
202 *Soc.* **2019**, 141, 1833-1837.
- 203 (11) Liu, Qiang, et al. "A proximity-tagging system to identify membrane protein-protein interactions." *Nat. methods* **2018**,  
204 15, 715-722.
- 205 (12) Liu, Zilei, et al. "Detecting tumor antigen-specific T cells via interaction-dependent fucosyl-biotinylation." *Cell* **2020**,  
206 183, 1117-1133.

- (13) Qiu, Shuang, et al. “Use of intercellular proximity labeling to quantify and decipher cell-cell interactions directed by diversified molecular pairs.” *Sci. Adv.* **2022**, 8, eadd2337.
- (14) Kang, Myeong-Gyun, and Rhee, Hyun-Woo. “Molecular Spatiomics by Proximity Labeling.” *Acc. Chem. Res.* **2022**, 55, 1411-1422.
- (15) Geri, Jacob B., et al. “Microenvironment mapping via Dexter energy transfer on immune cells.” *Science* **2020**, 367, 1091-1097.
- (16) Oslund, Rob C., et al. “Detection of cell-cell interactions via photocatalytic cell tagging.” *Nat. Chem. Biol.* **2022**, 18, 850-858.
- (17) Liu, Hongyu, et al. “Antigen-specific T cell detection via photocatalytic proximity cell labeling (PhoXCELL).” *J. Am. Chem. Soc.* **2022**, 144, 5517-5526.
- (18) Qiu, Shuang, et al. “Ru(bpy)<sub>3</sub><sup>2+</sup>-Enabled Cell-Surface Photocatalytic Proximity Labeling toward More Efficient Capture of Physically Interacting Cells.” *Angew. Chem. Int. Ed.* **2023**, e202303014.
- (19) Lee, Song-Yi, et al. “Architecture mapping of the inner mitochondrial membrane proteome by chemical tools in live cells.” *J. Am. Chem. Soc.* **2017**, 139, 3651-3662.
- (20) Li, Yanan, et al. “Rapid enzyme-mediated biotinylation for cell surface proteome profiling.” *Anal. Chem.* **2021**, 93, 4542-4551.
- (21) Martell, Jeffrey D, et al. “A split horseradish peroxidase for the detection of intercellular protein-protein interactions and sensitive visualization of synapses.” *Nat. Biotechnol.* **2016**, 34, 774-780.
- (22) Li, Yanan, et al. “Temporal tracking of insulin action on the cell surface of proteins at a resolution of ten seconds.” *Anal. Chem.* **2023**, 95, 9323-9329.
- (23) Yang, Wen et al. “Selective and nongenetic peroxidase tag of membrane protein: a nucleic acid tool for proximity labeling” *Anal. Chem.* **2022**, 94, 1101-1107.
- (24) Zhu, Hao, et al. “Imaging and profiling of proteins under oxidative conditions in cells and tissues by hydrogen-peroxide-responsive labeling.” *J. Am. Chem. Soc.* **2020**, 142, 15711-15721.
- (25) Mishra, Pratyush Kumar, et al. “Enzymatic recording of local hydrogen peroxide generation using genetically encodable enzyme.” *Anal. Chem.* **2022**, 94, 14869-14877.
- (26) Wang, Guyu, et al. “Interception proximity labeling for interrogating cell efflux microenvironment.” *Anal. Chem.* **2023**, 95, 17798-17807.
- (27) Gough, D. R., and T. G. Cotter. “Hydrogen peroxide: a Jekyll and Hyde signalling molecule.” *Cell Death Dis.* **2011**, 2, e213-e213.
- (28) Bienert, Gerd P., and François Chaumont. “Aquaporin-facilitated transmembrane diffusion of hydrogen peroxide.” *Biochim. Biophys. Acta, Gen. Subj.* **2014**, 1840, 1596-1604.
- (29) Martell, Jeffrey D., et al. “Engineered ascorbate peroxidase as a genetically encoded reporter for electron microscopy.” *Nat. Biotechnol.* **2012**, 30, 1143-1148.
- (30) Škulj, Sanja, et al. “Comparison of two peroxidases with high potential for biotechnology applications—HRP vs. APEX2.” *Comput Struct Biotechnol J.* **2024**, 23, 742-751.

- 243 (29) Herb, Marc, and Schramm, Michael. "Functions of ROS in macrophages and antimicrobial immunity." *Antioxidants*  
244 **2021**, 10, 313.
- 245 (30) Shuster, S. Andrew, et al. "In situ cell-type-specific cell-surface proteomic profiling in mice." *Neuron* **2022**, 110, 3882-  
246 3896.
- 247 (32) Yegutkin, Gennady G., "Nucleotide- and nucleoside- converting ectoenzymes: Important modulators of purinergic  
248 signalling cascade." *Biochim. Biophys. Acta, Mol. Cell Res.* **2008**, 1783, 673-694.
- 249 (33) Di Virgilio, F., and Adinolfi, E. "Extracellular purines, purinergic receptors and tumor growth." *Oncogene* **2017**, 36,  
250 293-303.
- 251 (34) Zhao, Ning, et al. "A genetically encoded probe for imaging nascent and mature HA-tagged proteins *in vivo*." *Nat.*  
252 *Commun.* **2019**, 10, 2947.
- 253 (35) Götzke, Hansjörg, et al. "The ALFA-tag is a highly versatile tool for nanobody-based bioscience applications." *Nat.*  
254 *Commun.* **2019**, 10, 4403.
- 255 (36) Li, Jiefu, et al. "Cell-surface proteomic profiling in the fly brain uncovers wiring regulators." *Cell* **2020**, 180, 373-386.
- 256 (37) Takano, Tetsuya, et al. "Chemico-genetic discovery of astrocytic control of inhibition *in vivo*." *Nature* **2020**, 588, 296-  
257 302.
- 258 (38) Zhang, Xu, et al. "Cellular-scale proximity labeling for recording cell spatial organization in mouse tissues." *Sci. Adv.*  
259 **2023**, 9, eadg6388.
- 260 (39) Zhu, Hao, et al. "Tyrosinase-based proximity labeling in living cells and *in vivo*" *J. Am. Chem. Soc.* **2024**, 146, 7515-  
261 7523.
- 262 (40) Maginnis, Melissa S. "Virus–receptor interactions: the key to cellular invasion." *J Mol Biol.* **2018**, 430, 2590-2611.  
263

Table of Contents Artwork

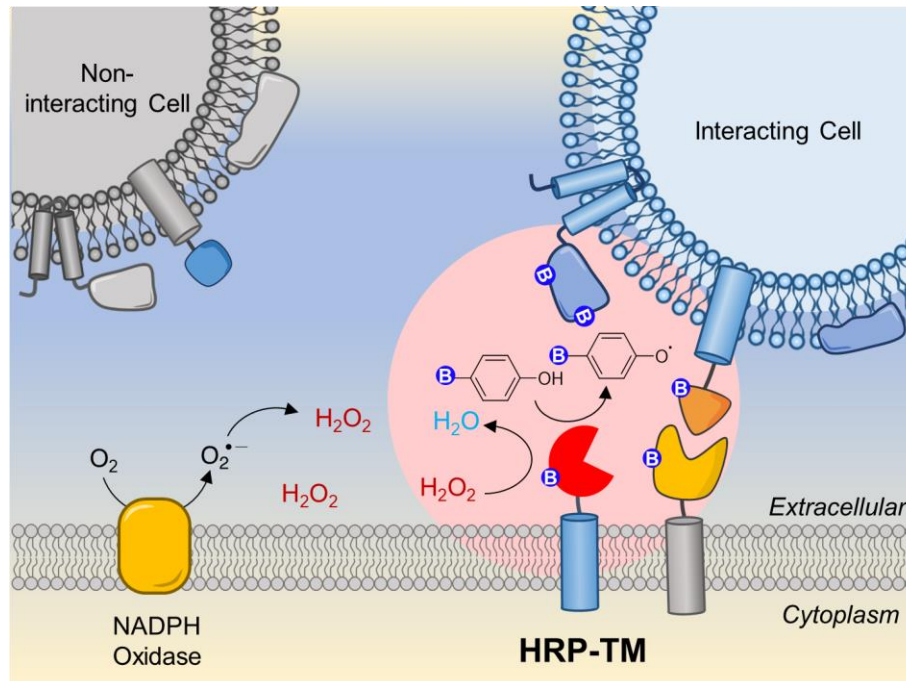

Source: https://www.biorxiv.org/content/10.1101/2024.06.11.598589v1.full.pdf
